# Supplementary material for: Kidney Cancer Diagnosis and Surgery Selection by Machine Learning from CT Scans Combined with Clinical Metadata
Source: MDPI journal article supplement (doi:10.3390/cancers15123189), 2023-06-14
Supplement: s1 [file s1]

# Supplementary Materials

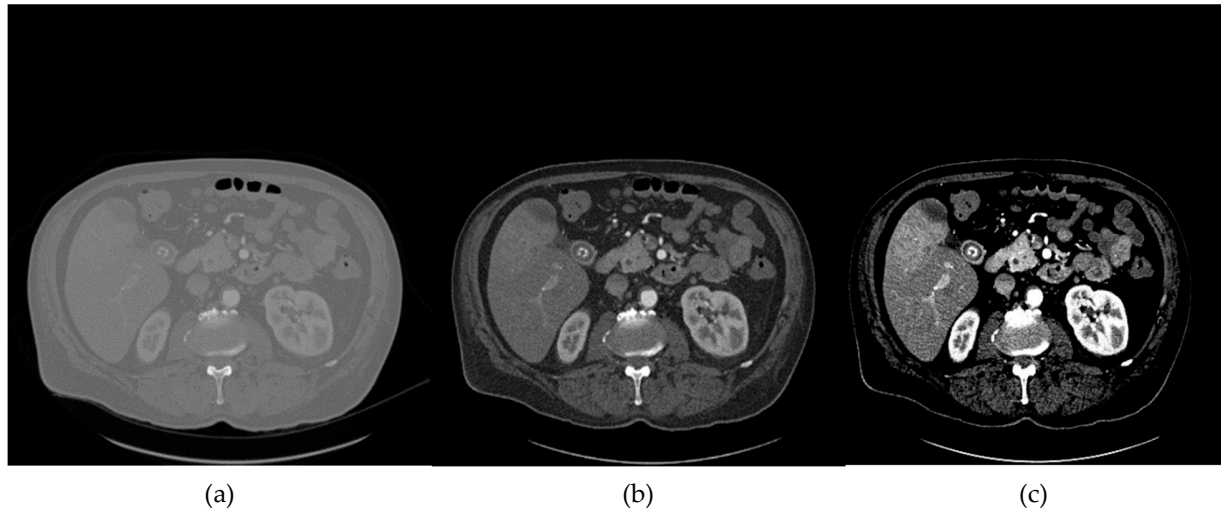

**Figure S1.** 2D Kidney CT slices of varying HU. **(a)** Total HU range, original slice, **(b)** range between [-200, 500], as used in the current study, and **(c)** [-30, 200].

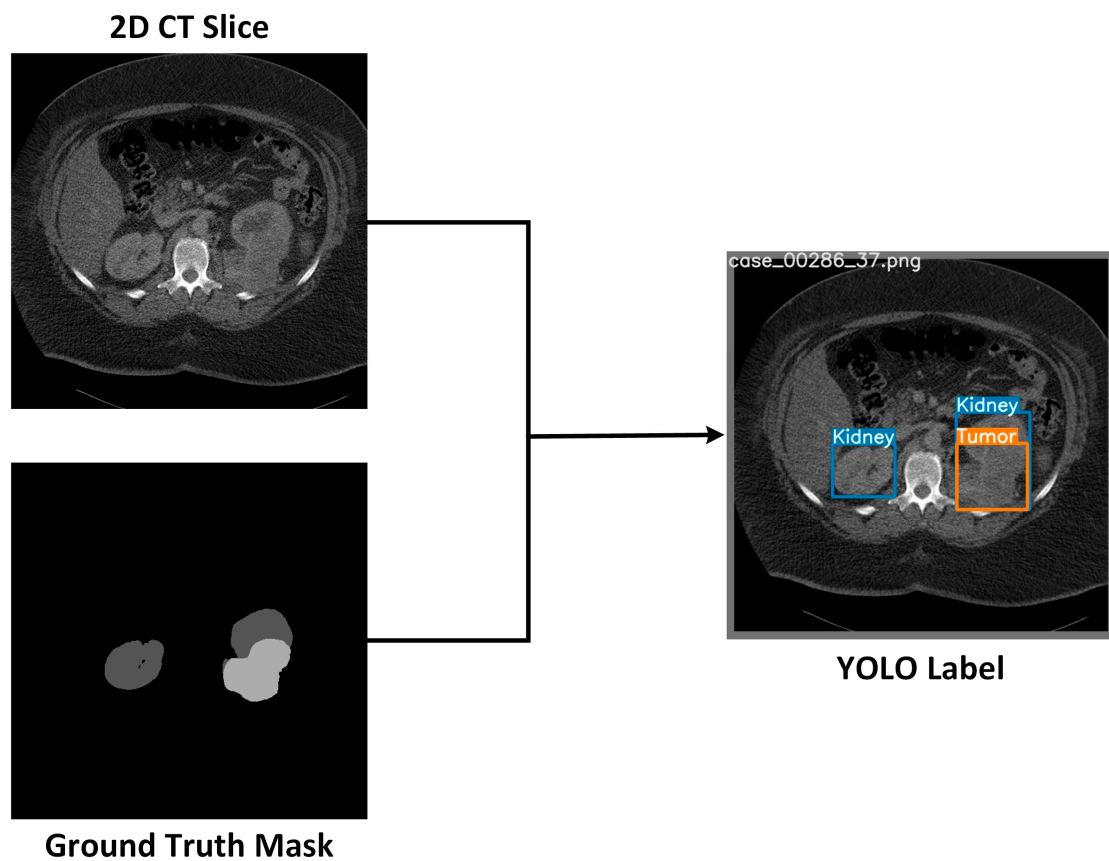

**Figure S2.** Bounding box creation process for training YOLO frameworks.

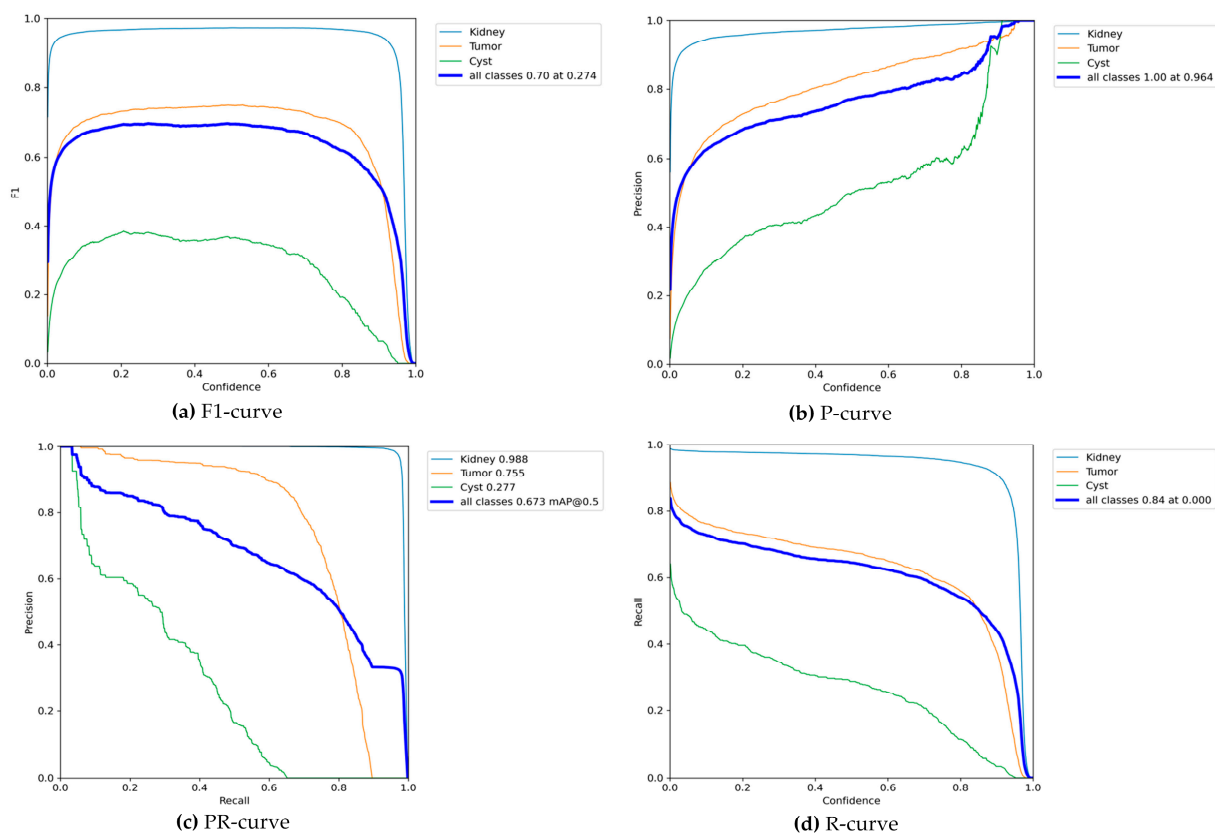

**Figure S3.** YOLOv7 model performance curves plotted for each object type (kidney, tumor, and cyst), alongside combined performance.

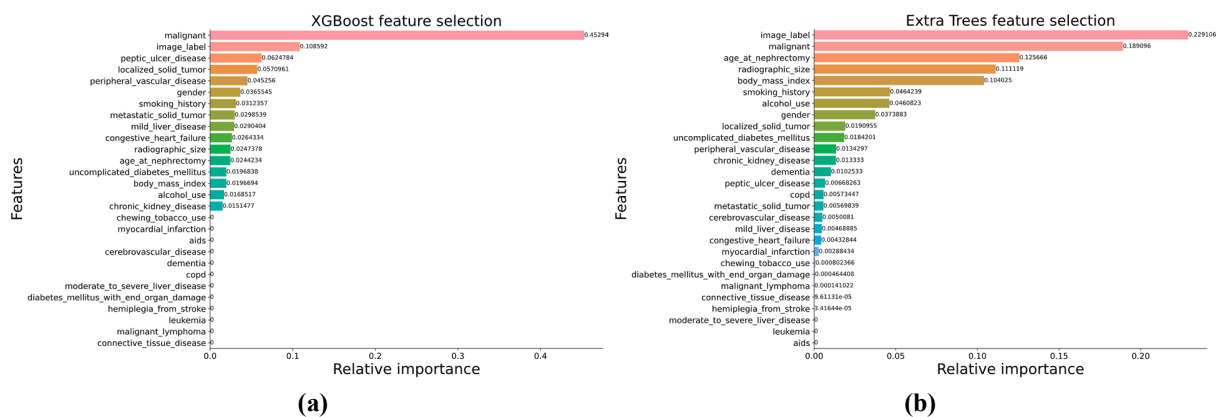

**Figure S4.** XGBoost **(a)** and Extra Trees **(b)** classifier-based feature selection outcomes for the kidney tumor classification. Ranked features from the Extra trees and Random Forest algorithms were very similar.

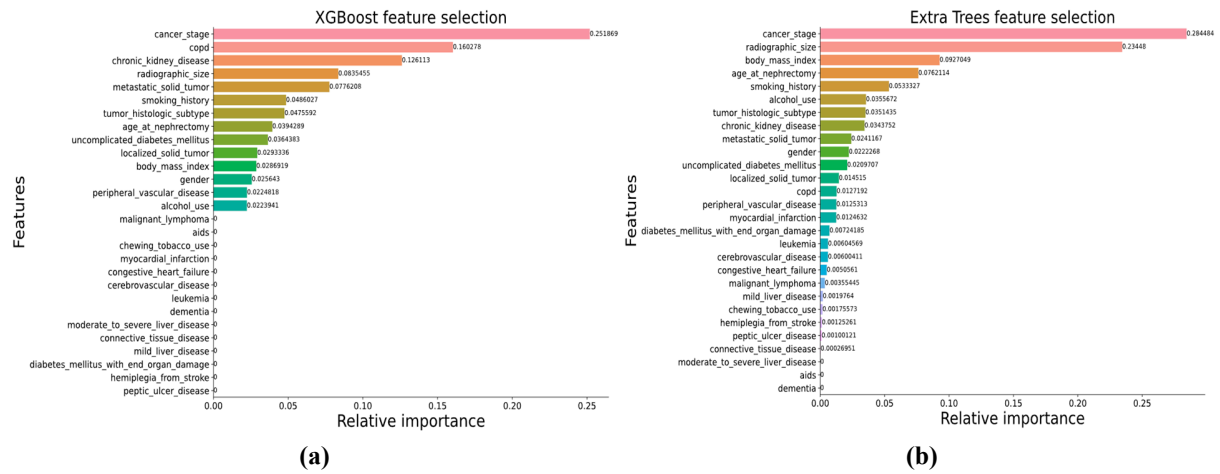

**Figure S5.** XGBoost **(a)** and Extra Trees **(b)** classifier-based feature selection outcomes for the surgery procedure classification. Ranked features from the Extra trees and Random Forest algorithms were very similar.

**Table S1.** Subject-wise split five-fold information regarding the subject range

| Fold Num | Train (Sub Range)   | Validation (Sub Range) | Test (Sub Range) |
|----------|---------------------|------------------------|------------------|
| 1        | "1-192"             | "193-240"              | "241-300"        |
| 2        | "(1-132)+(241-300)" | "133-180"              | "181-240"        |
| 3        | "(1-72)+(181-300)"  | "73-120"               | "121-180"        |
| 4        | "(1-12)+(121-300)"  | "13-60"                | "61-120"         |
| 5        | "109-300"           | "61-108"               | "1-60"           |
